# Supplementary material
Source: publisher figshare collection journal article supplement (https://brill.figshare.com/articles/dataset/_/14872695)
Supplement: Supplementary file 1 [file 1]

# **Exploring Reference Frame Integration Using Response Demands in a Tactile Temporal-Order Judgement Task**

**Kaian Unwalla<sup>1,\*</sup>, Daniel Goldreich<sup>1,\*\*</sup> and David I. Shore<sup>1,2,\*\*\*</sup>**

<sup>1</sup> Department of Psychology, Neuroscience & Behaviour, McMaster University, 1280 Main  
Street West, Hamilton, ON L8S 4K1, Canada

<sup>2</sup> Multisensory Perception Laboratory, a Division of the Multisensory Mind Inc., Hamilton, ON,  
Canada

Received 30 October 2020; accepted 10 June 2021

\* To whom correspondence should be addressed. E-mail: unwallk@mcmaster.ca

\*\* ORCID: 0000-0002-5104-2185

\*\*\* ORCID: 0000-0003-2562-1017
